# Supplementary material for: Environmental, population, and life stage plasticity in the visual system of Atlantic cod
Source: Oxford University Press journal article supplement (doi:10.1242/jeb.165191), 2017-01-01
Supplement: jeb165191supp.pdf [file jeb165191supp.pdf]

## Supplemental material

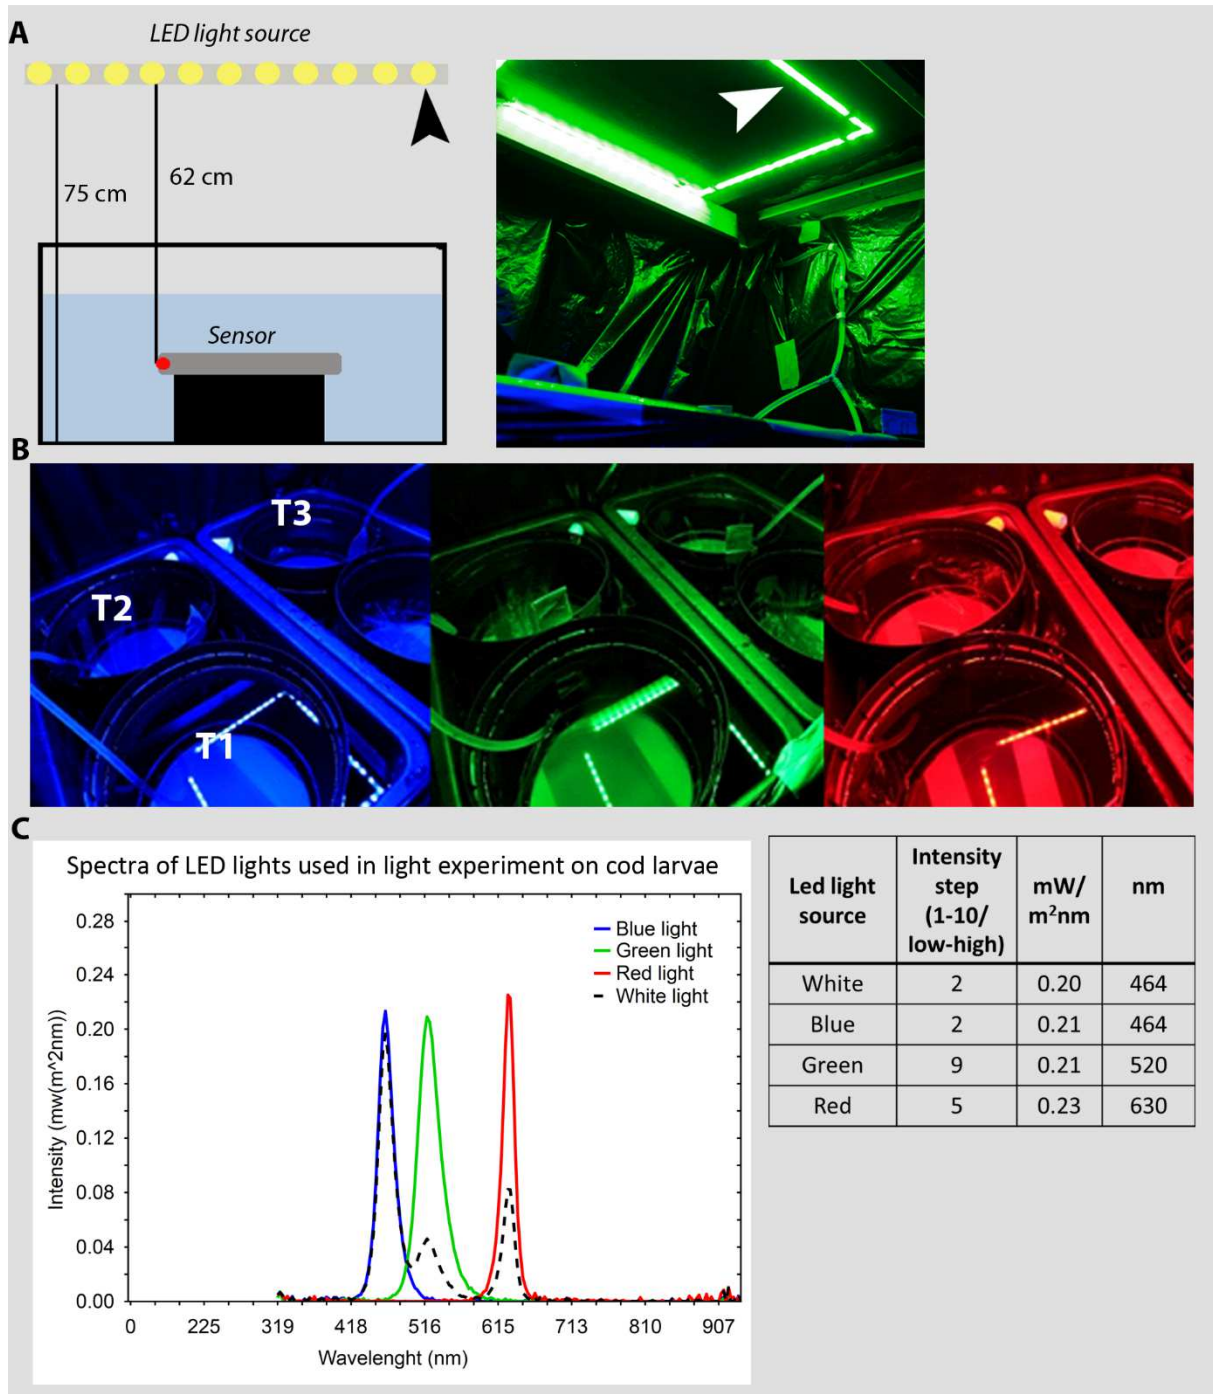

**Figure S1. Experimental setup light treatments cod larvae.** A) Left handside illustrates the position at which the optical recordings were obtained within the fish tanks, and a photo of the LED light source is shown on the right hand side. B) The photos show the setup of the larval rearing tanks under different wavelenght lights of blue, green and red, respectively. C) Optical measurements were plotted for all LED lights used (left hand side), where the y-axis shows LED intensity measured in mW

$\text{m}^{-2} \text{nm}^{-1}$  over nanometer wavelength distribution (x-axis). The table on the right hand side shows specter data values for the used LED lights, where the chosen intensity step was normalized across the different light sources.

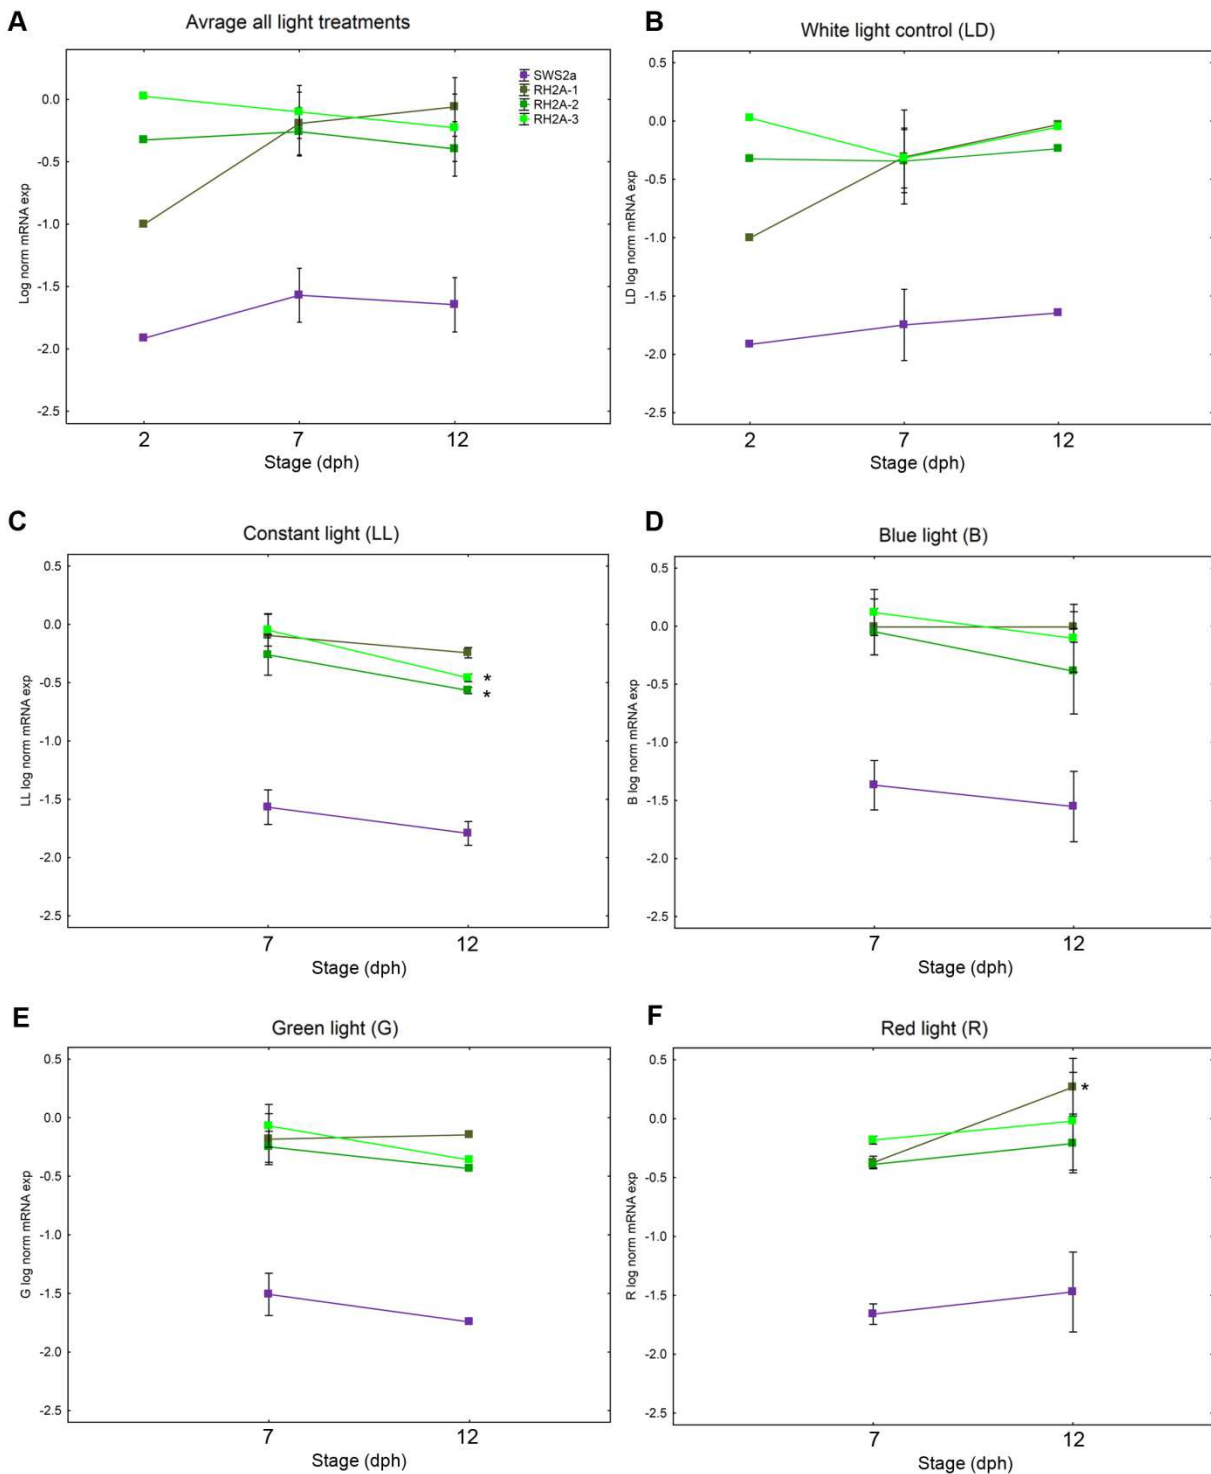

**Figure S2.** Temporal expression of cone opsins during light treatments (A-F). The different opsins are represented by different colors shown in A. Expression values marked with (\*) in C and F represents significantly different ( $p < 0.05$ ) expression between 7- and 12 dph, using a one-way ANOVA.

## Supplemental material: Statistical analyses

### Light experiment NC cod larvae

**Table S1. Normality test light experiment.** Shapiro-Wilks test of goodness of fit on log transformed normalized qPCR expression data for all visual opsins in all stages and treatments.  $W=1$  if data are perfectly normal in distribution. Underlined and bold  $W$  values are significantly smaller than 1 ( $p<0.05$ ), indicating rejection of the normal distribution hypothesis. Missing cells (-) represent stages where  $N$  is too low and test could not be performed.

| Stage (dph) | Treatment | SWS2A       | RH2A-1      | RH2A-2      | RH2A-3      |
|-------------|-----------|-------------|-------------|-------------|-------------|
| 7           | LD        | $W = 0.815$ | $W = 0.943$ | $W = 0.936$ | $W = 0.937$ |
| 12          | LD        | $W = -$     | $W = -$     | $W = -$     | $W = -$     |
| 7           | LL        | $W = 0.889$ | $W = 0.942$ | $W = 0.938$ | $W = 0.827$ |
| 12          | LL        | $W = 0.886$ | $W = 0.875$ | $W = 0.967$ | $W = 0.823$ |
| 7           | B         | $W = 0.992$ | $W = 0.948$ | $W = 0.970$ | $W = 0.991$ |
| 12          | B         | $W = -$     | $W = -$     | $W = -$     | $W = -$     |
| 7           | G         | $W = 0.899$ | $W = 0.876$ | $W = 0.999$ | $W = 0.999$ |
| 12          | G         | $W = -$     | $W = -$     | $W = -$     | $W = -$     |
| 7           | R         | $W = 0.958$ | $W = 0.991$ | $W = 0.882$ | $W = 1.000$ |
| 12          | R         | $W = -$     | $W = -$     | $W = -$     | $W = -$     |

**Table S2. Levene's Test for Homogeneity of Variances. Significant effects ( $p<0.05$ )**

| Stage (dph) | Treatment | SWS2A                | RH2A-1               | RH2A-2               | RH2A-3               |
|-------------|-----------|----------------------|----------------------|----------------------|----------------------|
| 7-12        | LD        | $P = 0.248$          | $P = 0.354$          | $P = 0.344$          | $P = 0.349$          |
| 7-12        | LL        | $P = 0.421$          | $P = 0.096$          | $P = 0.064$          | $P = \mathbf{0.048}$ |
| 7-12        | B         | $P = 0.483$          | $P = 0.356$          | $P = 0.195$          | $P = 0.439$          |
| 7-12        | G         | $P = 0.230$          | $P = 0.215$          | $P = 0.402$          | $P = 0.405$          |
| 7-12        | R         | $P = \mathbf{0.009}$ | $P = \mathbf{0.007}$ | $P < \mathbf{0.001}$ | $P < \mathbf{0.000}$ |

**Table S3. Two-way ANOVA light treatment; stage\*treatment.**

| Effect             | Analysis of Variance. Marked effects are significant at $p < .050$ |         |           |          |       |
|--------------------|--------------------------------------------------------------------|---------|-----------|----------|-------|
|                    | Value                                                              | F       | Effect df | Error df | p     |
| Intercept          | 0.005                                                              | 780.006 | 4         | 15.000   | 0.000 |
| <b>Stage (dpf)</b> | 0.121                                                              | 7.029   | 8         | 30.000   | 0.000 |
| Treatment          | 0.423                                                              | 0.944   | 16        | 46.463   | 0.528 |
|                    |                                                                    |         |           |          |       |

**Table S5. Tukey HSD post hoc for stage effect *sws2a*.**

| Cell No. | Tukey HSD test; variable <b>Log Relative SWS2a express</b> . Approximate Probabilities for Post Hoc Tests<br>Error: Between MS = .04453, df = 18.000 |        |        |       |
|----------|------------------------------------------------------------------------------------------------------------------------------------------------------|--------|--------|-------|
|          | Stage (dph)                                                                                                                                          | {1}    | {2}    | {3}   |
| 1        | 2                                                                                                                                                    | -1.915 | 0.2780 | 0.464 |
| 2        | 7                                                                                                                                                    | 0.280  |        | 0.677 |
| 3        | 12                                                                                                                                                   | 0.464  | 0.677  |       |

**Table S6.1. Tukey HSD post hoc for stage effect *rh2a-1*.**

| Cell No. | Tukey HSD test; variable <b>Log Relative RH2-1 express</b> . Approximate Probabilities for Post Hoc Tests<br>Error: Between MS = .06455, df = 18.000 |        |        |       |
|----------|------------------------------------------------------------------------------------------------------------------------------------------------------|--------|--------|-------|
|          | Stage (dph)                                                                                                                                          | {1}    | {2}    | {3}   |
| 1        | 2                                                                                                                                                    | -1.002 | 0.017  | 0.006 |
| 2        | 7                                                                                                                                                    | 0.017  |        | 0.361 |
| 3        | 12                                                                                                                                                   | 0.007  | 0.3617 |       |

**Table S6.2. Bonferroni post hoc for stage effect *rh2a-1*.**

| Bonferroni test; variable <b>Log Relative RH2-1 express</b> . Probabilities for Post Hoc Tests Error: Between MSE = .06712, df = 17.000 |             |        |        |        |
|-----------------------------------------------------------------------------------------------------------------------------------------|-------------|--------|--------|--------|
| Cell No.                                                                                                                                | Stage (dph) | {1}    | {2}    | {3}    |
|                                                                                                                                         |             | -1.002 | -.1932 | -.0601 |
| 1                                                                                                                                       | 2           |        | 0.023  | 0.010  |
| 2                                                                                                                                       | 7           | 0.023  |        | 0.771  |
| 3                                                                                                                                       | 12          | 0.010  | 0.771  |        |

**Table S7. Tukey HSD post hoc for stage effect *rh2a-2*.**

| Tukey HSD test; variable <b>Log Relative RH2-2 express</b> . Approximate Probabilities for Post Hoc Tests Error: Between MS = .04333, df = 18.000 |             |        |        |        |
|---------------------------------------------------------------------------------------------------------------------------------------------------|-------------|--------|--------|--------|
| Cell No.                                                                                                                                          | Stage (dph) | {1}    | {2}    | {3}    |
|                                                                                                                                                   |             | -.3244 | -.2580 | -.3966 |
| 1                                                                                                                                                 | 2           |        | 0.949  | 0.942  |
| 2                                                                                                                                                 | 7           | 0.949  |        | 0.280  |
| 3                                                                                                                                                 | 12          | 0.942  | 0.280  |        |

**Table S8. Tukey HSD post hoc for stage effect *rh2a-3*.**

| Tukey HSD test; variable <b>Log Relative RH2-3 express</b> . Approximate Probabilities for Post Hoc Tests Error: Between MS = .05228, df = 18.000 |             |        |        |        |
|---------------------------------------------------------------------------------------------------------------------------------------------------|-------------|--------|--------|--------|
| Cell No.                                                                                                                                          | Stage (dph) | {1}    | {2}    | {3}    |
|                                                                                                                                                   |             | .02566 | -.1001 | -.2266 |
| 1                                                                                                                                                 | 2           |        | 0.860  | 0.558  |
| 2                                                                                                                                                 | 7           | 0.860  |        | 0.407  |
| 3                                                                                                                                                 | 12          | 0.558  | 0.407  |        |

**Table S9. One-way ANOVA light treatment for stage effect.**

| Effect      | Analysis of Variance. Marked effects are significant at $p < .050$ |         |           |          |       |
|-------------|--------------------------------------------------------------------|---------|-----------|----------|-------|
|             | Value                                                              | F       | Effect df | Error df | P     |
| Intercept   | 0.005                                                              | 921.301 | 4         | 19       | 0.00  |
| Stage (dph) | 0.106                                                              | 9.824   | 8         | 38       | 0.000 |

Significant ( $p < 0.05$ ) Tukey HSD post hoc test for stage effect within treatment

**Table S10.1 Tukey HSD post hoc for stage effect within treatment LL.**

| Stage (dph) | Treatment=LL Tukey HSD test; Variable: <b>Log Relative RH2-2 express</b> . Marked differences are significant at $p < .050$ |                 |                 |
|-------------|-----------------------------------------------------------------------------------------------------------------------------|-----------------|-----------------|
|             | {1}<br>M=0.0000                                                                                                             | {2}<br>M=-.2613 | {3}<br>M=-.5667 |
| 2 {1}       |                                                                                                                             |                 |                 |
| 7 {2}       |                                                                                                                             |                 | 0.040           |
| 12 {3}      |                                                                                                                             | 0.040           |                 |

**Table S10.2 Bonferroni post hoc for stage effect within treatment LL.**

| Stage (dph) | Treatment=LL Bonferroni test; Variable: <b>Log Relative RH2-2 express</b> . Marked differences are significant at $p < .050$ . Error: Between MS = ,01562, df = 4,0000 |                 |                 |
|-------------|------------------------------------------------------------------------------------------------------------------------------------------------------------------------|-----------------|-----------------|
|             | {1}<br>M=0.0000                                                                                                                                                        | {2}<br>M=-.2613 | {3}<br>M=-.5667 |
| 2 {1}       |                                                                                                                                                                        |                 |                 |
| 7 {2}       |                                                                                                                                                                        |                 | 0.040           |
| 12 {3}      |                                                                                                                                                                        | 0.040           |                 |

**Table S11.1 Tukey HSD post hoc for stage effect within treatment LL.**

| <b>Treatment=LL Tukey HSD test; Variable: Log Relative RH2-3 express. Marked differences are significant at <math>p &lt; .050</math></b> |          |          |          |
|------------------------------------------------------------------------------------------------------------------------------------------|----------|----------|----------|
| Stage (dph)                                                                                                                              | {1}      | {2}      | {3}      |
|                                                                                                                                          | M=0.0000 | M=-.0496 | M=-.4579 |
| 2 {1}                                                                                                                                    |          |          |          |
| 7 {2}                                                                                                                                    |          |          | 0.008    |
| 12 {3}                                                                                                                                   |          | 0.008    |          |

**Table S11.2 Bonferroni post hoc for stage effect within treatment LL.**

| <b>Treatment=LL Bonferroni test; Variable: Log Relative RH2-3 express. Marked differences are significant at <math>p &lt; .050</math>. Error: Between MS = ,00992, df = 4,0000</b> |          |          |          |
|------------------------------------------------------------------------------------------------------------------------------------------------------------------------------------|----------|----------|----------|
| Stage (dph)                                                                                                                                                                        | {1}      | {2}      | {3}      |
|                                                                                                                                                                                    | M=0.0000 | M=-.0496 | M=-.4579 |
| 2 {1}                                                                                                                                                                              |          |          |          |
| 7 {2}                                                                                                                                                                              |          |          | 0.008    |
| 12 {3}                                                                                                                                                                             |          | 0.008    |          |

**Table S12.1 Tukey HSD post hoc for stage effect within treatment R.**

| <b>Treatment=R Tukey HSD test; Variable: Log Relative RH2-1 express. Marked differences are significant at <math>p &lt; .050</math></b> |          |          |          |
|-----------------------------------------------------------------------------------------------------------------------------------------|----------|----------|----------|
| Stage (dph)                                                                                                                             | {1}      | {2}      | {3}      |
|                                                                                                                                         | M=0.0000 | M=-.3723 | M=.26714 |
| 2 {1}                                                                                                                                   |          |          |          |
| 7 {2}                                                                                                                                   |          |          | 0.018    |
| 12 {3}                                                                                                                                  |          | 0.018    |          |



**Table S12.2 Bonferroni post hoc for stage effect within treatment R.**

| Treatment=R Bonferroni test; Variable: <b>Log Relative RH2-1 express</b> . Marked differences are significant at $p < .050$ . Error: Between MS = ,02186, df = 3,0000 |          |          |          |
|-----------------------------------------------------------------------------------------------------------------------------------------------------------------------|----------|----------|----------|
| Stage (dph)                                                                                                                                                           | {1}      | {2}      | {3}      |
|                                                                                                                                                                       | M=0.0000 | M=-.3723 | M=.26714 |
| 2 {1}                                                                                                                                                                 |          |          |          |
| 7 {2}                                                                                                                                                                 |          |          | 0.018    |
| 12 {3}                                                                                                                                                                |          | 0.018    |          |

### Maturing NC cod

**Table S13. Normality maturing cod.** Shapiro-Wilks test of goodness of fit on log transformed normalized qPCR expression data for all visual opsins.  $W=1$  if data are perfectly normal in distribution. Underlined and bold  $W$  values are significantly smaller than 1 ( $p < 0.05$ ), indicating rejection of the normal distribution hypothesis.

| Gene          | Female                  | Male                    |
|---------------|-------------------------|-------------------------|
| <b>RH1</b>    | <b><u>W = 0.841</u></b> | <b><u>W = 0.756</u></b> |
| <b>Rh2a-1</b> | W = 0.903               | <b><u>W = 0.751</u></b> |
| <b>Sws2a</b>  | W = 0.924               | <b><u>W = 0.565</u></b> |

**Table S14. Levene's Test for Homogeneity of Variances. Significant effects ( $p < 0.05$ )**

| Variable                 | Levene Test of Homogeneity of Variances. Marked effects are significant at $p < .05$ |           |           |          |          |          |       |       |
|--------------------------|--------------------------------------------------------------------------------------|-----------|-----------|----------|----------|----------|-------|-------|
|                          | SS Effect                                                                            | df Effect | MS Effect | SS Error | df Error | MS Error | F     | p     |
| Rh1 Log Norm mRNA exp    | 0.030                                                                                | 2         | 0.015     | 0.254    | 25       | 0.010    | 1.497 | 0.243 |
| Sws2a Log Norm mRNA exp  | 0.052                                                                                | 2         | 0.026     | 1.518    | 25       | 0.061    | 0.431 | 0.654 |
| Rh2a-1 Log Norm mRNA exp | 0.033                                                                                | 2         | 0.016     | 0.295    | 25       | 0.012    | 1.387 | 0.268 |

**Table S15. Main effects ANOVA Gene\*Part-of-retina\*Gender.** Significant effect ( $p < 0.05$ )

| Effect                      | Univariate Tests of Significance for Log norm mRNA exp. Sigma-restricted parameterization Effective hypothesis decomposition |                  |        |          |       |
|-----------------------------|------------------------------------------------------------------------------------------------------------------------------|------------------|--------|----------|-------|
|                             | SS                                                                                                                           | Degr. of Freedom | MS     | F        | p     |
| Intercept                   | 10.903                                                                                                                       | 1                | 10.903 | 279.150  | 0.000 |
| <b>Gene</b>                 | 110.587                                                                                                                      | 2                | 55.294 | 1415.652 | 0.000 |
| Part of retina              | 0.009                                                                                                                        | 1                | 0.009  | 0.240    | 0.626 |
| Gender                      | 0.128                                                                                                                        | 1                | 0.128  | 3.273    | 0.076 |
| Gene:*Part of retina        | 0.050                                                                                                                        | 2                | 0.025  | 0.636    | 0.533 |
| Gene:*Gender                | 0.027                                                                                                                        | 2                | 0.013  | 0.344    | 0.710 |
| Part of retina*Gender       | 0.048                                                                                                                        | 1                | 0.047  | 1.215    | 0.275 |
| Gene:*Part of retina*Gender | 0.027                                                                                                                        | 2                | 0.013  | 0.344    | 0.710 |
| Error                       | 2.109                                                                                                                        | 54               | 0.039  |          |       |

**Table S16.1. Tukey HSD post hoc for gene effect.**

| Cell No. | Tukey HSD test; variable Log norm mRNA exp. Approximate Probabilities for Post Hoc Tests<br>Error: Between MS = .03698, df = 61.000 |            |            |            |
|----------|-------------------------------------------------------------------------------------------------------------------------------------|------------|------------|------------|
|          | Gene:                                                                                                                               | {1}        | {2}        | {3}        |
|          |                                                                                                                                     | 1.8530     | -1.293     | .67694     |
| 1        | RH1                                                                                                                                 |            | P << 0.001 | P << 0.001 |
| 2        | SWS2A                                                                                                                               | P << 0.001 |            | P << 0.001 |
| 3        | RH2A-1                                                                                                                              | P << 0.001 | P << 0.001 |            |

**Table S16.2. Bonferroni post hoc for gene effect.**

| Bonferroni test; variable Log norm mRNA exp. Probabilities for Post Hoc Tests Error:<br>Between MSE = ,06607, df = 81,000 |        |               |               |              |
|---------------------------------------------------------------------------------------------------------------------------|--------|---------------|---------------|--------------|
| Cell No.                                                                                                                  | Gene:  | {1}<br>1.9954 | {2}<br>-1.132 | {3}<br>.9150 |
| 1                                                                                                                         | RH1    |               | P << 0.001    | P << 0.001   |
| 2                                                                                                                         | SWS2A  | P << 0.001    |               | P << 0.001   |
| 3                                                                                                                         | RH2A-1 | P << 0.001    | P << 0.001    |              |

Northeast Arctic cod (NEA cod)

**Table S17. Test of normality distribution Northeast Arctic cod.** *Shapiro-Wilks test of goodness of fit on log transformed normalized qPCR expression data for all visual opsins. W=1 if data are perfectly normal in distribution. Underlined and bold W values are significantly smaller than 1 ( $p < 0.05$ ), indicating rejection of the normal distribution hypothesis.*

| Season        | Part of retina | RH1       | SWS2A                   | RH2A-1                  | RH2A-2    | RH2A-3    |
|---------------|----------------|-----------|-------------------------|-------------------------|-----------|-----------|
| <b>Summer</b> | Dorsal         | W = 0.902 | W = 0.883               | W = 0.926               | W = 0.955 | W = 0.923 |
| <b>Summer</b> | Ventral        | W = 0.945 | W = 0.856               | W = 0.934               | W = 0.954 | W = 0.929 |
| <b>Winter</b> | Dorsal         | W = 0.946 | W = 0.930               | <b><u>W = 0.808</u></b> | W = 0.959 | W = 0.951 |
| <b>Wintre</b> | Ventral        | W = 0.953 | <b><u>W = 0.731</u></b> | <b><u>W = 0.893</u></b> | W = 0.943 | W = 0.929 |

**Table S18. Levene's Test for Homogeneity of Variances. Significant effects ( $p < 0.05$ )**

| Gene          | Levene's Test for Homogeneity of Variances: Effect: <b>Season</b> Degrees of freedom for all F's: 1, 138 |          |       |              |
|---------------|----------------------------------------------------------------------------------------------------------|----------|-------|--------------|
|               | MS Effect                                                                                                | MS Error | F     | p            |
| RH1           | 0.000                                                                                                    | 0.025    | 0.012 | 0.915        |
| Sws2a         | 0.007                                                                                                    | 0.049    | 0.145 | 0.704        |
| <b>Rh2a-1</b> | 0.230                                                                                                    | 0.021    | 18.7  | <b>0.000</b> |
| Rh2a-2        | 0.001                                                                                                    | 0.10     | 0.014 | 0.907        |
| Rh2a-3        | 0.037                                                                                                    | 0.030    | 1.221 | 0.276        |

**Table S19. Levene's Test for Homogeneity of Variances. Significant effects ( $p < 0.05$ )**

| Season                                  | All Groups Levene's Test for Homogeneity of Variances: Effect: <b>"Part of retina" by gene</b> Degrees of freedom for all F's: 1, 131 |          |       |       |
|-----------------------------------------|---------------------------------------------------------------------------------------------------------------------------------------|----------|-------|-------|
|                                         | MS Effect                                                                                                                             | MS Error | F     | p     |
| <b>Summer</b> Log Norm. mRNA exp (ubiq) | 0.247                                                                                                                                 | 0.368    | 0.672 | 0.414 |

**Table S20. Levene's Test for Homogeneity of Variances. Significant effects ( $p < 0.05$ )**

| Season                          | All Groups Levene's Test for Homogeneity of Variances: Effect: <b>"Part of retina" by gene</b> Degrees of freedom for all F's: 1, 138 |          |       |       |
|---------------------------------|---------------------------------------------------------------------------------------------------------------------------------------|----------|-------|-------|
|                                 | MS Effect                                                                                                                             | MS Error | F     | p     |
| <b>Winter</b> log norm mRNA exp | 0.675                                                                                                                                 | 0.387    | 1.742 | 0.189 |

**Table S21. Main effects ANOVA Gene\*Part-of-retina\*Season.** Significant effect ( $p < 0.05$ )

| Effect                      | Univariate Tests of Significance for Log Norm. mRNA exp. Sigma-restricted parameterization Effective hypothesis decomposition |                  |         |          |       |
|-----------------------------|-------------------------------------------------------------------------------------------------------------------------------|------------------|---------|----------|-------|
|                             | SS                                                                                                                            | Degr. of Freedom | MS      | F        | p     |
| Intercept                   | 123.368                                                                                                                       | 1                | 123.368 | 1268.362 | 0.000 |
| Gene:                       | 693.768                                                                                                                       | 5                | 138.754 | 1426.542 | 0.000 |
| Part of retina              | 2.228                                                                                                                         | 1                | 2.228   | 22.910   | 0.000 |
| Season                      | 0.343                                                                                                                         | 1                | 0.343   | 3.529    | 0.062 |
| Gene:*Part of retina        | 3.990                                                                                                                         | 5                | 0.798   | 8.203    | 0.000 |
| Gene:*Season                | 0.168                                                                                                                         | 5                | 0.034   | 0.344    | 0.885 |
| Part of retina*Season       | 0.187                                                                                                                         | 1                | 0.187   | 1.925    | 0.167 |
| Gene:*Part of retina*Season | 0.121                                                                                                                         | 5                | 0.024   | 0.248    | 0.940 |
| Error                       | 20.426                                                                                                                        | 210              | 0.097   |          |       |

**Table S22.1. Tukey HSD post hoc for Gene\*Part of retina Winter.**

|          |                | Tukey HSD test; <b>variable log norm mRNA Winter</b> . Approximate Probabilities for Post Hoc Tests Error: Between MS = .07208, df = 108.00 |            |            |            |            |            |            |            |            |                         |                         |            |            |  |
|----------|----------------|---------------------------------------------------------------------------------------------------------------------------------------------|------------|------------|------------|------------|------------|------------|------------|------------|-------------------------|-------------------------|------------|------------|--|
| Cell No. | gene3          | Part of retina3                                                                                                                             | {1}        | {2}        | {3}        | {4}        | {5}        | {6}        | {7}        | {8}        | {9}                     | {10}                    | {11}       | {12}       |  |
|          |                |                                                                                                                                             | 1.6424     | 1.6384     | -          | -          | -          | -          | 1.0950     | 1.2138     | -                       | -                       | -          | -          |  |
|          |                |                                                                                                                                             |            |            | .9213      | .8416      | 3.287      | 3.152      | 0          | 8          | 1.077                   | .1692                   | 2.339      | 2.064      |  |
| 1        | RH1            | Dorsal                                                                                                                                      |            | 1.000      | P << 0.001              | P << 0.001              | P << 0.001 | P << 0.001 |  |
| 2        | RH1            | Ventral                                                                                                                                     | 1.000      |            | P << 0.001              | P << 0.001              | P << 0.001 | P << 0.001 |  |
| 3        | SW S2A         | Dorsal                                                                                                                                      | P << 0.001 | P << 0.001 |            | 1.000      | P << 0.001 | P << 0.001 | P << 0.001 | P << 0.001 | 0.978                   | P << 0.001              | P << 0.001 | P << 0.001 |  |
| 4        | SW S2A         | Ventral                                                                                                                                     | P << 0.001 | P << 0.001 | 1.000      |            | P << 0.001 | P << 0.001 | P << 0.001 | P << 0.001 | 0.716                   | P << 0.001              | P << 0.001 | P << 0.001 |  |
| 5        | SW S2B         | Dorsal                                                                                                                                      | P << 0.001 | P << 0.001 | P << 0.001 | P << 0.001 |            | 0.993      | P << 0.001 | P << 0.001 | P << 0.001              | P << 0.001              | P << 0.001 | P << 0.001 |  |
| 6        | SW S2B         | Ventral                                                                                                                                     | P << 0.001 | P << 0.001 | P << 0.001 | P << 0.001 | 0.993      |            | P << 0.001 | P << 0.001 | P << 0.001              | P << 0.001              | P << 0.001 | P << 0.001 |  |
| 7        | RH2 A-1        | Dorsal                                                                                                                                      | P << 0.001 |            | 0.998      | P << 0.001              | P << 0.001              | P << 0.001 | P << 0.001 |  |
| 8        | RH2 A-1        | Ventral                                                                                                                                     | P < 0.05   | P < 0.05   | P << 0.001 | P << 0.001 | P << 0.001 | P << 0.001 | 0.998      |            | P << 0.001              | P << 0.001              | P << 0.001 | P << 0.001 |  |
| 9        | <b>RH2 A-2</b> | Dorsal                                                                                                                                      | P << 0.001 | P << 0.001 | 0.978      | 0.716      | P << 0.001 | P << 0.001 | P << 0.001 | P << 0.001 |                         | <b>P &lt;&lt; 0.001</b> | P << 0.001 | P << 0.001 |  |
| 10       | <b>RH2 A-2</b> | Ventral                                                                                                                                     | P << 0.001 | <b>P &lt;&lt; 0.001</b> |                         | P << 0.001 | P << 0.001 |  |
| 11       | RH2 A-3        | Dorsal                                                                                                                                      | P << 0.001              | P << 0.001              |            | 0.489      |  |
| 12       | RH2 A-3        | Ventral                                                                                                                                     | P << 0.001              | P << 0.001              | 0.489      |            |  |

**Table S22.2. Bonferroni post hoc test for Gene\*Part of retina Winter.**

|          |                | Bonferroni test; <b>variable log norm mRNA Winter</b> . Probabilities for Post Hoc Tests Error:<br>Between MS = ,07208, df = 108,00 |            |            |            |            |            |            |            |            |                         |                         |            |            |  |
|----------|----------------|-------------------------------------------------------------------------------------------------------------------------------------|------------|------------|------------|------------|------------|------------|------------|------------|-------------------------|-------------------------|------------|------------|--|
| Cell No. | gene3          | Part of retina3                                                                                                                     | {1}        | {2}        | {3}        | {4}        | {5}        | {6}        | {7}        | {8}        | {9}                     | {10}                    | {11}       | {12}       |  |
|          |                |                                                                                                                                     | 1.6424     | 1.6384     | - .9213    | - .8416    | - 3.287    | - 3.152    | 1.0950     | 1.2138     | - 1.077                 | - .1692                 | - 2.339    | - 2.064    |  |
| 1        | RH1            | Dorsal                                                                                                                              |            | 1.000      | P << 0.001              | P << 0.001              | P << 0.001 | P << 0.001 |  |
| 2        | RH1            | Ventral                                                                                                                             | 1.000      |            | P << 0.001              | P << 0.001              | P << 0.001 | P << 0.001 |  |
| 3        | SW S2A         | Dorsal                                                                                                                              | P << 0.001 | P << 0.001 |            | 1.000      | P << 0.001 | P << 0.001 | P << 0.001 | P << 0.001 | 1.000                   | P << 0.001              | P << 0.001 | P << 0.001 |  |
| 4        | SW S2A         | Ventral                                                                                                                             | P << 0.001 | P << 0.001 | 1.000      |            | P << 0.001 | P << 0.001 | P << 0.001 | P << 0.001 | 1.000                   | P << 0.001              | P << 0.001 | P << 0.001 |  |
| 5        | SW S2B         | Dorsal                                                                                                                              | P << 0.001 | P << 0.001 | P << 0.001 | P << 0.001 |            | 1.000      | P << 0.001 | P << 0.001 | P << 0.001              | P << 0.001              | P << 0.001 | P << 0.001 |  |
| 6        | SW S2B         | Ventral                                                                                                                             | P << 0.001 | P << 0.001 | P << 0.001 | P << 0.001 | 1.000      |            | P << 0.001 | P << 0.001 | P << 0.001              | P << 0.001              | P << 0.001 | P << 0.001 |  |
| 7        | RH2 A-1        | Dorsal                                                                                                                              | P << 0.001 |            | 1.000      | P << 0.001              | P << 0.001              | P << 0.001 | P << 0.001 |  |
| 8        | RH2 A-1        | Ventral                                                                                                                             | P < 0.05   | P < 0.05   | P << 0.001 | P << 0.001 | P << 0.001 | P << 0.001 | 1.000      |            | P << 0.001              | P << 0.001              | P << 0.001 | P << 0.001 |  |
| 9        | <b>RH2 A-2</b> | Dorsal                                                                                                                              | P << 0.001 | P << 0.001 | 1.000      | 1.000      | P << 0.001 | P << 0.001 | P << 0.001 | P << 0.001 |                         | <b>P &lt;&lt; 0.001</b> | P << 0.001 | P << 0.001 |  |
| 10       | <b>RH2 A-2</b> | Ventral                                                                                                                             | P << 0.001 | <b>P &lt;&lt; 0.001</b> |                         | P << 0.001 | P << 0.001 |  |
| 11       | RH2 A-3        | Dorsal                                                                                                                              | P << 0.001              | P << 0.001              |            | 1.000      |  |
| 12       | RH2 A-3        | Ventral                                                                                                                             | P << 0.001              | P << 0.001              | 1.000      |            |  |

**Table S23.1. Tukey HSD post hoc for Gene\*Part of retina Early fall.**

| Tukey HSD test; <b>variable log norm mRNA exp Early fall</b> . Approximate Probabilities for Post Hoc Tests Error: Between MS = .12394, df = 102.00 |                    |                |                   |                   |               |               |               |               |                   |                   |                        |                        |                |                |
|-----------------------------------------------------------------------------------------------------------------------------------------------------|--------------------|----------------|-------------------|-------------------|---------------|---------------|---------------|---------------|-------------------|-------------------|------------------------|------------------------|----------------|----------------|
| Cell No.                                                                                                                                            | Gene               | Part of retina | {1}<br>1.679<br>5 | {2}<br>1.644<br>5 | {3}<br>-1.018 | {4}<br>-1.051 | {5}<br>-3.326 | {6}<br>-3.242 | {7}<br>1.071<br>4 | {8}<br>1.114<br>8 | {9}<br>-1.033          | {10}<br>-.4316         | {11}<br>-2.381 | {12}<br>-2.210 |
| 1                                                                                                                                                   | RH1                | Dorsal         |                   | 1.000             | P <<<br>0.001     | P <<<br>0.001     | P <<<br>0.001          | P <<<br>0.001          | P <<<br>0.001  | P <<<br>0.001  |
| 2                                                                                                                                                   | RH1                | Ventral        | 1.000             |                   | P <<<br>0.001     | P <<<br>0.001     | P <<<br>0.001          | P <<<br>0.001          | P <<<br>0.001  | P <<<br>0.001  |
| 3                                                                                                                                                   | SW<br>S2A          | Dorsal         | P <<<br>0.001     | P <<<br>0.001     |               | 1.000         | P <<<br>0.001 | P <<<br>0.001 | P <<<br>0.001     | P <<<br>0.001     | 1.000                  | P <<<br>0.001          | P <<<br>0.001  | P <<<br>0.001  |
| 4                                                                                                                                                   | SW<br>S2A          | Ventral        | P <<<br>0.001     | 0.000<br>118      | 1.000         |               | P <<<br>0.001 | P <<<br>0.001 | P <<<br>0.001     | P <<<br>0.001     | 1.000                  | P <<<br>0.001          | P <<<br>0.001  | P <<<br>0.001  |
| 5                                                                                                                                                   | SW<br>S2B          | Dorsal         | P <<<br>0.001     | P <<<br>0.001     | P <<<br>0.001 | P <<<br>0.001 |               | 0.999<br>996  | P <<<br>0.001     | P <<<br>0.001     | P <<<br>0.001          | P <<<br>0.001          | P <<<br>0.001  | P <<<br>0.001  |
| 6                                                                                                                                                   | SW<br>S2B          | Ventral        | P <<<br>0.001     | P <<<br>0.001     | P <<<br>0.001 | P <<<br>0.001 | 0.999<br>996  |               | P <<<br>0.001     | P <<<br>0.001     | P <<<br>0.001          | P <<<br>0.001          | P <<<br>0.001  | P <<<br>0.001  |
| 7                                                                                                                                                   | RH2<br>A-1         | Dorsal         | P <<br>0.05       | P <<br>0.05       | P <<<br>0.001 | P <<<br>0.001 | P <<<br>0.001 | P <<<br>0.001 |                   | 1.000             | P <<<br>0.001          | P <<<br>0.001          | P <<<br>0.001  | P <<<br>0.001  |
| 8                                                                                                                                                   | RH2<br>A-1         | Ventral        | P <<br>0.05       | P <<br>0.05       | P <<<br>0.001 | P <<<br>0.001 | P <<<br>0.001 | P <<<br>0.001 | 1.000             |                   | P <<<br>0.001          | P <<<br>0.001          | P <<<br>0.001  | P <<<br>0.001  |
| 9                                                                                                                                                   | <b>RH2<br/>A-2</b> | Dorsal         | P <<<br>0.001     | P <<<br>0.001     | 1.000         | 1.000         | P <<<br>0.001 | P <<<br>0.001 | P <<<br>0.001     | P <<<br>0.001     |                        | <b>P &lt;<br/>0.05</b> | P <<<br>0.001  | P <<<br>0.001  |
| 10                                                                                                                                                  | <b>RH2<br/>A-2</b> | Ventral        | P <<<br>0.001     | P <<<br>0.001     | P <<br>0.05   | P <<<br>0.001 | P <<<br>0.001 | P <<<br>0.001 | P <<<br>0.001     | P <<<br>0.001     | <b>P &lt;<br/>0.05</b> |                        | P <<<br>0.001  | P <<<br>0.001  |
| 11                                                                                                                                                  | RH2<br>A-3         | Dorsal         | P <<<br>0.001     | P <<<br>0.001     | P <<<br>0.001 | P <<<br>0.001 | P <<<br>0.001 | P <<<br>0.001 | P <<<br>0.001     | P <<<br>0.001     | P <<<br>0.001          | P <<<br>0.001          |                | 0.996          |
| 12                                                                                                                                                  | RH2<br>A-3         | Ventral        | P <<<br>0.001     | P <<<br>0.001     | P <<<br>0.001 | P <<<br>0.001 | P <<<br>0.001 | P <<<br>0.001 | P <<<br>0.001     | P <<<br>0.001     | P <<<br>0.001          | P <<<br>0.001          | 0.996          |                |



**Table S23.2. Bonferroni post hoc test for Gene\*Part of retina Early fall.**

| Bonferroni test; variable log norm mRNA exp Early fall. Probabilities for Post Hoc Tests Error: Between MS = .12394, df = 102.00 |                |                |            |            |            |            |            |            |            |            |                    |                    |            |            |
|----------------------------------------------------------------------------------------------------------------------------------|----------------|----------------|------------|------------|------------|------------|------------|------------|------------|------------|--------------------|--------------------|------------|------------|
| Cell No.                                                                                                                         | Gene           | Part of retina | {1}        | {2}        | {3}        | {4}        | {5}        | {6}        | {7}        | {8}        | {9}                | {10}               | {11}       | {12}       |
|                                                                                                                                  |                |                | 1.6795     | 1.6445     | -1.018     | -1.051     | -3.326     | -3.242     | 1.0714     | 1.1148     | -1.033             | -.4316             | -2.381     | -2.210     |
| 1                                                                                                                                | RH1            | Dorsal         |            | 1.000      | P << 0.001 | P < 0.05   | P << 0.001         | P << 0.001         | P << 0.001 | P << 0.001 |
| 2                                                                                                                                | RH1            | Ventral        | 1.000      |            | P << 0.001 | P < 0.05   | P << 0.001         | P << 0.001         | P << 0.001 | P << 0.001 |
| 3                                                                                                                                | SW S2A         | Dorsal         | P << 0.001 | P << 0.001 |            | 1.000      | P << 0.001 | P << 0.001 | P << 0.001 | P << 0.001 | 1.000              | P << 0.001         | P << 0.001 | P << 0.001 |
| 4                                                                                                                                | SW S2A         | Ventral        | P << 0.001 | 0.000118   | 1.000      |            | P << 0.001 | P << 0.001 | P << 0.001 | P << 0.001 | 1.000              | P << 0.001         | P << 0.001 | P << 0.001 |
| 5                                                                                                                                | SW S2B         | Dorsal         | P << 0.001 | P << 0.001 | P << 0.001 | P << 0.001 |            | 1.000      | P << 0.001 | P << 0.001 | P << 0.001         | P << 0.001         | P << 0.001 | P << 0.001 |
| 6                                                                                                                                | SW S2B         | Ventral        | P << 0.001 | P << 0.001 | P << 0.001 | P << 0.001 | 1.000      |            | P << 0.001 | P << 0.001 | P << 0.001         | P << 0.001         | P << 0.001 | P << 0.001 |
| 7                                                                                                                                | RH2 A-1        | Dorsal         | P < 0.05   | P < 0.05   | P << 0.001 | P << 0.001 | P << 0.001 | P << 0.001 |            | 1.000      | P << 0.001         | P << 0.001         | P << 0.001 | P << 0.001 |
| 8                                                                                                                                | RH2 A-1        | Ventral        | P < 0.05   | P < 0.05   | P << 0.001 | P << 0.001 | P << 0.001 | P << 0.001 | 1.000      |            | P << 0.001         | P << 0.001         | P << 0.001 | P << 0.001 |
| 9                                                                                                                                | <b>RH2 A-2</b> | Dorsal         | P << 0.001 | P << 0.001 | 1.000      | 1.000      | P << 0.001 | P << 0.001 | P << 0.001 | P << 0.001 |                    | <b>P &lt; 0.05</b> | P << 0.001 | P << 0.001 |
| 10                                                                                                                               | <b>RH2 A-2</b> | Ventral        | P << 0.001 | P << 0.001 | P < 0.05   | P << 0.001 | <b>P &lt; 0.05</b> |                    | P << 0.001 | P << 0.001 |
| 11                                                                                                                               | RH2 A-3        | Dorsal         | P << 0.001         | P << 0.001         |            | 1.000      |
| 12                                                                                                                               | RH2 A-3        | Ventral        | P << 0.001         | P << 0.001         | 1.000      |            |
